# Supplementary material for: Discovery of thermosetting polymers with low hygroscopicity, low thermal expansivity, and high modulus by machine learning
Source: Royal Society of Chemistry journal article supplement (doi:10.1039/d2ta09272g), 2023-01-01
Supplement: d2ta09272g1.xlsx [file d2ta09272g1.xlsx]

## Sheet: SimulationData
Supporting Information for DATA
SMILES	Hygroscopicity(%)	LCTE(ppm/C)	TensileModulus(GPa)
C/C(=C\C(C)(C)c1ccc(OC#N)cc1)c1ccc(OC#N)cc1	1.116	82.17	3.631
C/C=C(\c1ccc(OC#N)cc1)C(CC)c1ccc(OC#N)cc1	1.254	104.076	3.507
C[Si](C)(C)c1cc(Cc2cc(-c3ccccn3)c(OC#N)c([Si](C)(C)C)c2)cc(-c2ccccn2)c1OC#N	0.579	86.874	2.929
C[Si](C)(c1ccc(OC#N)cc1)c1ccc(OC#N)cc1	1.426	90.408	3.536
C=Cc1cc(C2(c3cc(C)c(OC#N)c(C=C)c3)OS(=O)(=O)c3ccccc32)cc(C)c1OC#N	0.802	65.336	4.528
C=CCc1cc(C(C)(C)c2ccc(OC#N)c(CC=C)c2)ccc1OC#N	0.481	117.708	3.783
CC(=O)c1ccc(OC#N)c(OC#N)c1	3.85	68.334	4.059
CC(=O)c1ccc(OC#N)cc1OC#N	4.845	56.402	4.076
CC(=O)N1C(=O)c2ccccc2C1(c1ccc(OC#N)cc1)c1ccc(OC#N)cc1	2.106	49.789	5.1
CC(C)(C)c1cc(OC#N)c(C(C)(C)C)cc1OC#N	0.731	105.748	3.657
CC(C)(c1c(Br)c(Br)c(OC#N)c(Br)c1Br)c1c(Br)c(Br)c(OC#N)c(Br)c1Br	0.282	48.549	3.457
CC(C)(c1c(Cl)c(Cl)c(OC#N)c(Cl)c1Cl)c1c(Cl)c(Cl)c(OC#N)c(Cl)c1Cl	0.751	49.795	4.087
CC(C)(c1cc(Br)c(OC#N)c(Br)c1)c1cc(Br)c(OC#N)c(Br)c1	0.551	59.281	3.694
CC(C)(c1cc(Cl)c(OC#N)c(Cl)c1)c1cc(Cl)c(OC#N)c(Cl)c1	0.751	50.66	3.857
CC(C)(c1cc(Cl)c(OC#N)c(Cl)c1Cl)c1cc(Cl)c(OC#N)c(Cl)c1Cl	0.786	52.528	4.15
CC(C)(c1ccc(OC#N)c(F)c1)c1ccc(OC#N)c(F)c1	1.475	71.786	3.781
CC(C)(c1ccc(OC#N)cc1)c1ccc(OC#N)cc1	1.608	81.541	3.674
CC(C)(c1ccc(OC#N)cc1)c1cccc(C(C)(C)c2ccc(OC#N)cc2)c1	0.798	91.696	3.58
CC(C)(c1ccc(OC#N)cc1[N+](=O)[O-])c1ccc(OC#N)cc1[N+](=O)[O-]	3.887	57.207	4.264
CC(C)(Cc1ccc(OC#N)cc1)c1ccc(OC#N)c(F)c1	1.231	103.336	3.358
CC(C)CNC(=C\C(=O)/C=C/c1ccc(OC#N)cc1)/C=C/c1ccc(OC#N)cc1	1.288	87.734	3.034
CC(c1cc(Br)c(OC#N)c(Br)c1)(c1cc(Br)c(OC#N)c(Br)c1)c1cc(Br)c(OC#N)c(Br)c1	0.979	42.373	4.174
CC(c1ccc(OC#N)c(N)c1)c1ccc(OC#N)c(N)c1	3.381	63.501	4.985
CC(c1ccc(OC#N)cc1)(c1ccc(OC#N)cc1)c1ccc(OC#N)cc1	3.365	42.143	4.986
CC(c1ccc(OC#N)cc1)c1ccc(OC#N)cc1	1.759	80.066	3.496
CC(c1ccccc1)(c1ccc(OC#N)cc1)c1ccc(OC#N)cc1	1.274	85.211	4.028
CC(CC(C)(C)c1ccc(OC#N)cc1)c1ccc(OC#N)cc1	0.93	88.972	3.399
CC/C(=C(/CC)c1ccc(OC#N)c(OC)c1)c1ccc(OC#N)c(OC)c1	0.673	86.038	3.541
CC1(C)c2cccc(-c3ccc(OC#N)c(C=O)c3)c2Oc2c(-c3ccc(OC#N)c(C=O)c3)cccc21	1.268	79.938	3.744
CC1=CCC2C(C1)C(=O)OC2(c1ccc(OC#N)cc1)c1ccc(OC#N)cc1	1.669	55.365	3.89
Cc1c(Br)ccc2c1NC(=O)C2(c1ccc(OC#N)cc1)c1ccc(OC#N)cc1	1.835	49.954	4.436
Cc1c(C)c2c(c(C)c1OC#N)Cc1c(C)c(OC#N)c(C)c(C)c1O2	0.765	61.591	2.877
Cc1c(C2(c3cc(Br)c(OC#N)c(Br)c3C)OS(=O)(=O)c3ccccc32)cc(Br)c(OC#N)c1Br	0.792	61.034	4.205
Cc1c(C2(c3cc(C(C)C)c(OC#N)c(Br)c3C)OS(=O)(=O)c3ccccc32)cc(C(C)C)c(OC#N)c1Br	0.373	77.082	3.654
Cc1c(-c2ccc(OC#N)cc2)nn(-c2ccc(OC#N)cc2)c1-c1ccc(/C=C/C(=O)N2CCCCC2)cc1	0.996	73.807	3.75
Cc1c(Cl)ccc2c1NC(=O)C2(c1ccc(OC#N)cc1)c1ccc(OC#N)cc1	2.146	56.195	4.487
Cc1c(OC#N)cccc1OC#N	4.715	94.139	3.097
Cc1cc(/C=C/C(=O)c2ccc(OC#N)cc2)ccc1OC#N	2.652	68.688	3.418
Cc1cc(C(C)(C)c2cc(C)c(OC#N)c(C)c2)cc(C)c1OC#N	0.686	82.995	3.115
Cc1cc(C(C)(C)c2ccc(OC#N)c(C)c2)ccc1OC#N	1.033	79.894	3.158
Cc1cc(C)c2c(c1)C(c1ccc(OC#N)cc1)(c1ccc(OC#N)cc1)C(=O)N2	2.023	57.846	4.549
Cc1cc(C2(c3cc(C)c(OC#N)c(Br)c3)OC(=O)c3ccccc32)cc(Br)c1OC#N	0.783	60.357	4.033
Cc1cc(C2(c3cc(C)c(OC#N)c(Br)c3)OS(=O)(=O)c3ccccc32)cc(Br)c1OC#N	0.726	52.175	4.01
Cc1cc(C2(c3cc(C)c(OC#N)c(Br)c3C)OS(=O)(=O)c3ccccc32)c(C)c(Br)c1OC#N	0.898	56.049	3.826
Cc1cc(C2(c3cc(C)c(OC#N)c(C)c3)C(=O)Nc3ccccc32)cc(C)c1OC#N	1.206	63.414	4.031
Cc1cc(C2(c3cc(C)c(OC#N)c(C)c3)OS(=O)(=O)c3ccccc32)cc(C)c1OC#N	1.117	78.682	4.144
Cc1cc(C2(c3cc(C)c(OC#N)c4ncccc34)OC(=O)c3ccccc32)c2cccnc2c1OC#N	2.568	65.332	3.944
Cc1cc(C2(c3cc(C)c(OC#N)cc3C)OS(=O)(=O)c3ccccc32)c(C)cc1OC#N	1.44	68.233	4.297
Cc1cc(C2(c3ccc(OC#N)c(C)c3)C(=O)N(Cc3ccccc3)c3ccccc32)ccc1OC#N	0.82	76.906	4.249
Cc1cc(C2(c3ccc(OC#N)c(C)c3)C(=O)Nc3ccccc32)ccc1OC#N	1.907	56.794	4.425
Cc1cc(C2(c3ccc(OC#N)c(C)c3)CC(CC(C)(C)C)C2)ccc1OC#N	0.547	82.329	3.237
Cc1cc(C2(c3ccc(OC#N)c(C)c3)CCCCC2)ccc1OC#N	0.728	80.005	4.074
Cc1cc(C2(c3ccc(OC#N)c(C)c3)NS(=O)(=O)c3ccccc32)ccc1OC#N	1.895	64.623	4.273
Cc1cc(C2(c3ccc(OC#N)c(C)c3)OS(=O)(=O)c3ccccc32)ccc1OC#N	1.369	71.486	4.324
Cc1cc(C2(c3ccc(OC#N)cc3)c3ccccc3-c3ccccc32)ccc1OC#N	1.161	68.561	3.992
Cc1cc(-c2ccc(OC#N)cc2)sc1-c1ccc(OC#N)cc1	2.268	52.843	4.863
Cc1cc(-c2cccc3cccc(-c4ccc(OC#N)c(C)c4)c23)ccc1OC#N	0.682	76.804	3.177
Cc1cc(Cc2cc(C)c(OC#N)c(C)c2)cc(C)c1OC#N	0.763	93.586	3.11
Cc1cc(Cc2cc(C)c(OC#N)c(C)c2C)c(C)c(C)c1OC#N	0.579	90.696	3.239
Cc1cc(Cc2cc(C)c(OC#N)c(Cl)c2)cc(C)c1OC#N	0.851	74.953	3.166
Cc1cc(Cc2ccc(OC#N)c(C)c2)ccc1OC#N	1.171	64.227	3.339
Cc1cc(Cl)c2c(Cc3cc(Br)c(OC#N)c4nc(C)cc(Cl)c34)cc(Br)c(OC#N)c2n1	1.15	56.67	3.469
Cc1cc(OC#N)c(C(C)C)cc1C1(c2cc(C(C)C)c(OC#N)cc2C)OS(=O)(=O)c2ccccc21	0.712	71.855	3.992
Cc1cc(OC#N)c(C)c(Br)c1C1(c2c(C)cc(OC#N)c(C)c2Br)OS(=O)(=O)c2ccccc21	1.061	51.972	3.994
Cc1cc(OC#N)cc(C)c1Cc1c(C)cc(OC#N)cc1C	0.98	56.089	3.476
Cc1cc(OC#N)cc(OC#N)c1	3.603	94.706	3.403
Cc1cc(OC#N)ccc1C1(c2ccc(OC#N)cc2C)OS(=O)(=O)c2ccccc21	1.906	64.031	4.186
Cc1cc(OC#N)ccc1CC(C)(C)c1ccc(OC#N)c(F)c1	1.11	85.426	3.287
Cc1cc(OC#N)ccc1OC#N	4.152	70.747	3.507
Cc1cc(Oc2ccc(OC#N)c(C)c2)ccc1OC#N	1.96	84.803	2.859
Cc1ccc2c(c1)C(c1ccc(OC#N)cc1)(c1ccc(OC#N)cc1)C(=O)N2	2.163	57.189	4.886
Cc1ccc2c(c1Cl)NC(=O)C2(c1ccc(OC#N)cc1)c1ccc(OC#N)cc1	2.067	54.52	4.635
Cc1ccc2c(C3(c4ccc(OC#N)c5nc(C)ccc45)OC(=O)c4ccccc43)ccc(OC#N)c2n1	2.316	63.909	3.992
Cc1cccc2c1NC(=O)C2(c1ccc(OC#N)cc1)c1ccc(OC#N)cc1	1.968	58.074	4.58
Cc1nc2c(OC#N)c(Br)cc(Cc3cc(Br)c(OC#N)c4nc(C)c(CCCl)c(Cl)c34)c2c(Cl)c1CCCl	0.892	66.776	4.388
CCC(=C(c1ccc(OC#N)cc1)c1ccc(OC#N)cc1)c1ccccc1	1.308	70.59	3.608
CCC(=C(c1ccc(OC#N)cc1)c1ccc(OC#N)cc1)c1ccncc1	2.086	66.631	3.897
CCC(C)(C)C1CCC(c2ccc(OC#N)cc2)(c2ccc(OC#N)cc2)CC1	0.956	81.565	3.759
CCC(C)(c1ccc(OC#N)cc1)c1ccc(OC#N)cc1	1.686	81.494	3.818
CCC(c1ccc(OC#N)cc1)C(CC)c1ccc(OC#N)c([N+](=O)[O-])c1	2.149	87.123	3.514
CCc1cc2c(C(=O)c3cc(Br)c(OC#N)c(Br)c3)cc(Br)c(OC#N)c2o1	0.594	68.486	4.003
CCCC(C)(c1ccc(OC#N)c(C)c1)c1ccc(OC#N)c(C)c1	1	85.397	3.437
CCCC(c1cc(C(C)(C)C)c(OC#N)c(C(C)(C)C)c1)c1cc(C(C)(C)C)c(OC#N)c(C(C)(C)C)c1	0.043	89.181	3.065
CCCC(Cc1ccc(OC#N)cc1)c1ccc(OC#N)cc1	1.192	107.29	3.443
CCCc1c(-c2ccc(OC#N)cc2)nn(-c2ccc(OC#N)cc2)c1C1CCCC1	1.137	61.608	3.502
CCCCC(CCCC)=C(c1ccc(OC#N)cc1)c1ccc(OC#N)cc1	0.628	120.73	3.418
CCCCCCC1(CCCCCC)c2cc(-c3ccc(OC#N)cc3)ccc2-c2ccc(-c3ccc(OC#N)cc3)cc21	0.347	105.914	3.569
CCCCSCCC(c1ccc(OC#N)cc1)C(CC)c1ccc(OC#N)cc1	0.615	121.725	3.922
CCCOC(=O)CCC(C)(c1ccc(OC#N)cc1)c1ccc(OC#N)cc1	0.827	95.77	4.324
CCN(CC)CCOC(=O)C(C)(c1ccc(OC#N)cc1)c1ccc(OC#N)cc1	0.888	139.184	3.947
CCn1c2ccccc2c2cc(C=C(c3ccc(OC#N)cc3)c3ccc(OC#N)cc3)ccc21	0.8	73.138	3.885
CCOC(=O)c1cc(OC#N)c(C(=O)OCC)cc1OC#N	1.411	99.666	4.233
CCOC(=O)c1ccccc1C(c1cc(Br)c(OC#N)c(Br)c1)c1cc(Br)c(OC#N)c(Br)c1	0.402	72.295	3.982
CN(C)C(=O)c1cccc2c1NC(=O)C2(c1ccc(OC#N)cc1)c1ccc(OC#N)cc1	1.986	61.685	5.006
CN(C)c1cc(Cc2cc(N(C)C)c(OC#N)c(N(C)C)c2)cc(N(C)C)c1OC#N	0.7	103.033	3.884
CN(C)Cc1cc(Cc2cc(CN(C)C)c(OC#N)c(CN(C)C)c2)cc(CN(C)C)c1OC#N	0.317	176.9	4.102
COc1c(OC#N)cc([N+](=O)[O-])cc1OC#N	2.203	92.575	3.229
COc1cc(/C=C/C(=O)CC(=O)/C=C/c2ccc(OC#N)cc2)ccc1OC#N	1.699	72.868	3.66
COc1cc(/C=C/c2ccc(OC#N)cc2)cc(OC)c1OC#N	1.382	88.871	3.938
COc1cc(/C=C\C(=O)CC(=O)/C=C/c2ccc(OC#N)c(OC)c2)ccc1OC#N	1.123	87.816	3.936
COc1cc(C(=O)/C(C)=C(\C)C(=O)c2ccc(OC#N)c(OC)c2)ccc1OC#N	1.204	78.059	4.262
COc1cc(C2(c3cc(OC)c(OC#N)c(OC)c3)c3ccccc3S(=O)(=O)N2C(=O)OCCS(C)(=O)=O)cc(OC)c1OC#N	0.829	94.037	5.844
COc1cc(C2(c3ccc(OC#N)cc3)NC(=O)c3ccccc32)ccc1OC#N	2.014	57.68	5.167
COc1cc(CC(C)C(C)Cc2cc(OC)c(OC#N)c(OC)c2)ccc1OC#N	0.383	109.568	3.446
COc1cc(CCc2cc(C=O)c(OC#N)c(OC)c2)cc(C=O)c1OC#N	1.101	79.388	4.328
COc1cc(OC#N)ccc1C(=O)/C=C/c1ccc(OC#N)cc1	2.029	67.288	3.557
COc1cc(OC#N)ccc1CC(C)C(C)Cc1ccc(OC#N)cc1	0.617	84.005	3.356
COc1ccc2c(c1)C(c1ccc(OC#N)cc1)(c1ccc(OC#N)cc1)C(=O)N2	2.108	66.952	5.333
COc1ccc2c(c1)NC(=O)C2(c1ccc(OC#N)cc1)c1ccc(OC#N)cc1	2.117	51.454	4.957
COc1ccnc(C(c2ccc(OC#N)cc2)c2ccc(OC#N)cc2)c1	1.419	85.933	4.067
CSCCOC(=O)C1C(c2ccc(OC#N)cc2)C(C(=O)OCCSC)C1c1ccc(OC#N)cc1	0.702	109.477	4.222
N#COc1[c][c]c(OC#N)c2[c][c][c][c]c12	2.782	87.077	3.7
N#COc1[c][c]c2[c]c(OC#N)[c][c]c2[c]1	2.718	85.434	4.511
N#COC1=CC=C(C(C2=CC=CC=C2)(C3=CC=C(OC#N)C=C3)C4=CC=CC=C4)C=C1	1.207	56.985	4.59
N#COC1=CC=C(C2(C3=CC=C(OC#N)C=C3)C4=C(C5=C2C=CC=C5)C=CC=C4)C=C1	1.25	54.031	4.311
N#COc1c([N+](=O)[O-])cc(C2(c3cc([N+](=O)[O-])c(OC#N)c([N+](=O)[O-])c3)OC(=O)c3ccccc32)cc1[N+](=O)[O-]	5.999	47.488	5.829
N#COc1c([N+](=O)[O-])cc(C2(c3cc([N+](=O)[O-])c(OC#N)c([N+](=O)[O-])c3)OS(=O)(=O)c3ccccc32)cc1[N+](=O)[O-]	5.818	49.088	5.879
N#COc1c(Br)cc(C(=O)c2cc(Br)c(OC#N)c(Br)c2)cc1Br	0.878	57.563	3.666
N#COc1c(Br)cc(C2(c3cc(Br)c(OC#N)c(Br)c3)C(=O)Nc3ccccc32)cc1Br	0.934	49.092	4.394
N#COc1c(Br)cc(C2(c3cc(Br)c(OC#N)c(Br)c3)C3CC4CC(C3)CC2C4)cc1Br	0.365	61.925	3.655
N#COc1c(Br)cc(C2(c3cc(Br)c(OC#N)c(Br)c3)c3ccccc3-c3ccccc32)cc1Br	0.423	58.965	3.944
N#COc1c(Br)cc(C2(c3cc(Br)c(OC#N)c(Br)c3)OC(=O)c3c(Br)c(Br)c(Br)c(Br)c32)cc1Br	0.457	57.492	4.473
N#COc1c(Br)cc(C2(c3cc(Br)c(OC#N)c(Br)c3)OC(=O)c3c(Cl)c(Cl)c(Cl)c(Cl)c32)cc1Br	0.712	46.953	4.823
N#COc1c(Br)cc(C2(c3cc(Br)c(OC#N)c(Br)c3)OC(=O)c3cc4ccccc4cc32)cc1Br	0.563	64.15	4.051
N#COc1c(Br)cc(C2(c3cc(Br)c(OC#N)c(Br)c3)OC(=O)c3ccc4ccccc4c32)cc1Br	0.453	53.62	4.487
N#COc1c(Br)cc(C2(c3cc(Br)c(OC#N)c(Br)c3)OC(=O)c3cccc4cccc2c34)cc1Br	0.549	56.341	4.074
N#COc1c(Br)cc(C2(c3cc(Br)c(OC#N)c(Br)c3)OC(=O)c3ccccc32)cc1Br	0.584	62.245	4.366
N#COc1c(Br)cc(C2(c3cc(Br)c(OC#N)c(Br)c3)OS(=O)(=O)c3c(Br)c(Br)c(Br)c(Br)c32)cc1Br	0.608	53.373	4.483
N#COc1c(Br)cc(C2(c3cc(Br)c(OC#N)c(Br)c3)OS(=O)(=O)c3ccccc32)cc1Br	0.744	51.835	4.665
N#COc1c(Cl)cc(C2(c3cc(Cl)c(OC#N)c([N+](=O)[O-])c3)OC(=O)c3ccccc32)cc1[N+](=O)[O-]	3.352	58.199	5.124
N#COc1c(Cl)cc(C2(c3cc(Cl)c(OC#N)c(Br)c3)OS(=O)(=O)c3ccccc32)cc1Br	1.035	45.301	4.762
N#COc1c(Cl)cc(C2(c3cc(Cl)c(OC#N)c(Cl)c3)CC3CC2C2CCCC32)cc1Cl	0.601	51.658	3.743
N#COc1c(Cl)cc(C2(c3cc(Cl)c(OC#N)c(Cl)c3)OC(=O)c3cccc4cccc2c34)cc1Cl	0.866	52.238	4.544
N#COc1c(Cl)cc(C2(c3cc(Cl)c(OC#N)c(Cl)c3)OC(=O)c3ccccc32)cc1Cl	0.988	56.429	4.459
N#COc1c(Cl)cc(C2(c3cc(Cl)c(OC#N)c(Cl)c3)OS(=O)(=O)c3c(Br)c(Br)c(Br)c(Br)c32)cc1Cl	0.943	41.385	4.775
N#COc1c(Cl)cc(C2(c3cc(Cl)c(OC#N)c(Cl)c3)OS(=O)(=O)c3ccccc32)cc1Cl	1.384	55.077	5.18
N#COc1c(I)cc(C2(c3cc(I)c(OC#N)c(I)c3)OC(=O)c3ccccc32)cc1I	0.275	56.358	3.356
N#COc1c(I)cc(C2(c3cc(I)c(OC#N)c(I)c3)OS(=O)(=O)c3ccccc32)cc1I	0.357	54.486	3.447
N#COc1c(N)cc(C2(c3cc(N)c(OC#N)c(Br)c3)OC(=O)c3ccccc32)cc1Br	2.104	72.618	5.128
N#COc1c(N)cc(C2(c3cc(N)c(OC#N)c(Cl)c3)OC(=O)c3ccccc32)cc1Cl	2.717	49.096	5.253
N#COc1cc(OC#N)cc(OC#N)c1	6.594	17.581	6.641
N#COc1ccc(/C=C(NC=O)/C(=C/c2ccc(OC#N)cc2)NC=O)cc1	3.255	51.635	5.716
N#COc1ccc(/C=C/C(=O)CCCCc2ccc(OC#N)cc2)cc1	1.147	76.55	3.576
N#COc1ccc(C(=C(Br)Br)c2ccc(OC#N)cc2)cc1	1.285	62.541	3.716
N#COc1ccc(C(=C(c2ccc(Br)cc2)c2ccc(Br)cc2)c2ccc(OC#N)cc2)cc1	0.634	65.345	3.337
N#COc1ccc(C(=C(Cl)Cl)c2ccc(OC#N)cc2)cc1	1.227	64.581	4.033
N#COc1ccc(C(=C2CCC(CF)CC2)c2ccc(OC#N)cc2)cc1	1.268	90.069	4.008
N#COc1ccc(C(=C2CCCC2)c2ccc(OC#N)cc2)cc1	1.286	77.094	3.749
N#COc1ccc(C(=N\N)/C(=N/N)c2ccc(OC#N)cc2)cc1	3.409	70.139	5.154
N#COc1ccc(C(=NNc2cccc([N+](=O)[O-])c2)c2ccc(OC#N)cc2)cc1	2.418	56.703	3.872
N#COc1ccc(C(=O)c2ccc(OC#N)c(Br)c2)cc1Br	1.36	60.475	3.934
N#COc1ccc(C(c2ccc(OC#N)cc2)(C(F)(F)F)C(F)(F)F)cc1	1.409	59.767	3.656
N#COc1ccc(C(c2ccc(OC#N)cc2)C(C(N)=O)c2ccccc2)cc1	2.587	68.683	4.433
N#COc1ccc(C(c2ccc(OC#N)cc2)C2CCC(Cl)(Cl)CC2)cc1	1.034	66.525	3.732
N#COc1ccc(C(c2ccc(OC#N)cc2)c2ccc(OC#N)cc2)cc1	2.978	33.924	5.604
N#COc1ccc(C(c2ccc(OC#N)cc2)c2ccc(Oc3ccccc3)cc2)cc1	1.145	77.383	4.066
N#COc1ccc(C(c2ccccc2)c2ccc(OC#N)cc2)cc1	1.396	67.525	3.764
N#COc1ccc(C2(c3cc(Cl)c(OC#N)c(Cl)c3)c3ccccc3-c3ccccc32)cc1Cl	0.84	56.098	4.327
N#COc1ccc(C2(c3ccc(OC#N)c([N+](=O)[O-])c3)c3cc(Br)ccc3-c3ccc(Br)cc32)cc1[N+](=O)[O-]	1.977	55.449	4.007
N#COc1ccc(C2(c3ccc(OC#N)c([N+](=O)[O-])c3)c3cc(C#Cc4ccccc4)ccc3-c3ccc(C#Cc4ccccc4)cc32)cc1[N+](=O)[O-]	1.878	80.313	3.954
N#COc1ccc(C2(c3ccc(OC#N)c([N+](=O)[O-])c3)c3ccccc3-c3ccccc32)cc1[N+](=O)[O-]	2.984	61.814	4.227
N#COc1ccc(C2(c3ccc(OC#N)c(Br)c3)c3ccccc3-c3ccccc32)cc1Br	0.702	62.767	3.947
N#COc1ccc(C2(c3ccc(OC#N)c(Br)c3)OC(=O)c3c([N+](=O)[O-])cccc32)cc1Br	1.955	59.263	4.759
N#COc1ccc(C2(c3ccc(OC#N)c(Br)c3)OC(=O)c3ccc(Cl)c4cccc2c34)cc1Br	0.799	50.679	4.104
N#COc1ccc(C2(c3ccc(OC#N)c(Br)c3)OC(=O)c3ccc4ccccc4c32)cc1Br	1.023	56.297	4.392
N#COc1ccc(C2(c3ccc(OC#N)c(Br)c3)OC(=O)c3cccc4c(Cl)ccc2c34)cc1Br	0.9	59.872	4.244
N#COc1ccc(C2(c3ccc(OC#N)c(Br)c3)OC(=O)c3cccc4cccc2c34)cc1Br	0.849	63.32	4.092
N#COc1ccc(C2(c3ccc(OC#N)c(Br)c3)OC(=O)c3ccccc32)cc1Br	1.085	60.733	4.334
N#COc1ccc(C2(c3ccc(OC#N)c(Br)c3)OS(=O)(=O)c3ccccc32)cc1Br	1.154	60.626	4.663
N#COc1ccc(C2(c3ccc(OC#N)c(-c4ccccc4)c3)OC(=O)c3ccccc32)cc1-c1ccccc1	0.843	62.849	4.333
N#COc1ccc(C2(c3ccc(OC#N)c(Cl)c3)OC(=O)c3c2ccc2ccccc32)cc1Cl	1.164	62.734	4.349
N#COc1ccc(C2(c3ccc(OC#N)c(Cl)c3)OC(=O)c3cc4ccccc4cc32)cc1Cl	1.223	53.863	4.312
N#COc1ccc(C2(c3ccc(OC#N)c(Cl)c3)OC(=O)c3cccc4c(Cl)ccc2c34)cc1Cl	1.068	61.124	4.213
N#COc1ccc(C2(c3ccc(OC#N)c(Cl)c3)OC(=O)c3cccc4cccc2c34)cc1Cl	1.096	59.476	4.533
N#COc1ccc(C2(c3ccc(OC#N)c(Cl)c3)OS(=O)(=O)c3ccccc32)cc1Cl	1.518	52.408	5.292
N#COc1ccc(C2(c3ccc(OC#N)c(I)c3)OC(=O)c3cc4ccccc4cc32)cc1I	0.653	62.577	3.648
N#COc1ccc(C2(c3ccc(OC#N)c(I)c3)OC(=O)c3ccc4ccccc4c32)cc1I	0.674	57.637	3.609
N#COc1ccc(C2(c3ccc(OC#N)c(I)c3)OC(=O)c3cccc4cccc2c34)cc1I	0.719	58.183	3.6
N#COc1ccc(C2(c3ccc(OC#N)c(N)c3)c3cc(C#Cc4ccccc4)ccc3-c3ccc(C#Cc4ccccc4)cc32)cc1N	1.218	69.484	4.461
N#COc1ccc(C2(c3ccc(OC#N)c(N)c3)c3ccccc3-c3ccccc32)cc1N	2.469	56.204	5.252
N#COc1ccc(C2(c3ccc(OC#N)c4ccccc34)c3ccccc3-c3ccccc32)c2ccccc12	0.958	50.049	3.99
N#COc1ccc(C2(c3ccc(OC#N)c4ncccc34)OC(=O)c3ccccc32)cc1	2.794	50.589	4.422
N#COc1ccc(C2(c3ccc(OC#N)cc3)C(=O)c3cccc4cccc2c34)cc1	1.615	57.33	4.529
N#COc1ccc(C2(c3ccc(OC#N)cc3)C(=O)c3ccccc3C2=O)cc1	1.769	65.168	4.48
N#COc1ccc(C2(c3ccc(OC#N)cc3)C(=O)N(Cc3ccccc3Cl)c3ccccc32)cc1	1.02	60.354	4.609
N#COc1ccc(C2(c3ccc(OC#N)cc3)C(=O)Nc3c(Br)cccc32)cc1	1.959	53.659	4.76
N#COc1ccc(C2(c3ccc(OC#N)cc3)C(=O)Nc3c(C#N)cccc32)cc1	3.792	56.148	4.967
N#COc1ccc(C2(c3ccc(OC#N)cc3)C(=O)Nc3c(-c4ccccc4)cccc32)cc1	1.808	63.686	4.277
N#COc1ccc(C2(c3ccc(OC#N)cc3)C(=O)Nc3c(-c4cccs4)cccc32)cc1	1.653	52.315	4.289
N#COc1ccc(C2(c3ccc(OC#N)cc3)C(=O)Nc3c(-c4ccncc4)cccc32)cc1	2.593	47.201	4.681
N#COc1ccc(C2(c3ccc(OC#N)cc3)C(=O)Nc3c(Cl)ccc(Cl)c32)cc1	2.129	50.717	5.212
N#COc1ccc(C2(c3ccc(OC#N)cc3)C(=O)Nc3c(Cl)cccc32)cc1	2.137	53.06	5.13
N#COc1ccc(C2(c3ccc(OC#N)cc3)C(=O)Nc3c2ccc(Cl)c3F)cc1	2.188	51.317	4.812
N#COc1ccc(C2(c3ccc(OC#N)cc3)C(=O)Nc3ccc([N+](=O)[O-])cc32)cc1	4.036	50.154	5.282
N#COc1ccc(C2(c3ccc(OC#N)cc3)C(=O)Nc3ccc(Br)cc32)cc1	2.098	52.881	4.712
N#COc1ccc(C2(c3ccc(OC#N)cc3)C(=O)Nc3ccc(-c4ccccc4)cc32)cc1	1.653	66.109	4.671
N#COc1ccc(C2(c3ccc(OC#N)cc3)C(=O)Nc3ccc(-c4cccs4)cc32)cc1	1.845	50.182	4.485
N#COc1ccc(C2(c3ccc(OC#N)cc3)C(=O)Nc3ccc(-c4ccncc4)cc32)cc1	2.498	55.625	4.893
N#COc1ccc(C2(c3ccc(OC#N)cc3)C(=O)Nc3ccc(Cl)cc32)cc1	2.228	51.812	5.302
N#COc1ccc(C2(c3ccc(OC#N)cc3)C(=O)Nc3ccc(N)cc32)cc1	3.159	52.765	5.543
N#COc1ccc(C2(c3ccc(OC#N)cc3)C(=O)Nc3ccccc32)cc1	2.53	49.776	5.257
N#COc1ccc(C2(c3ccc(OC#N)cc3)C(=O)Nc3ccncc32)cc1	3.507	52.561	5.453
N#COc1ccc(C2(c3ccc(OC#N)cc3)C(=O)Nc3ncccc32)cc1	3.119	58.132	5.489
N#COc1ccc(C2(c3ccc(OC#N)cc3)c3cc(Br)ccc3-c3ccc(Br)cc32)cc1	0.865	69.87	4.186
N#COc1ccc(C2(c3ccc(OC#N)cc3)c3cc4ccccc4cc3-c3cc4ccccc4cc32)cc1	0.959	69.34	3.745
N#COc1ccc(C2(c3ccc(OC#N)cc3)c3ccccc3C(=O)c3ccccc32)cc1	1.587	53.703	4.504
N#COc1ccc(C2(c3ccc(OC#N)cc3)c3ccccc3C(=O)N2c2ccccc2)cc1	1.572	56.855	4.489
N#COc1ccc(C2(c3ccc(OC#N)cc3)c3ccccc3C(c3ccccc3)(c3ccccc3)c3ccccc32)cc1	0.812	62.239	4.043
N#COc1ccc(C2(c3ccc(OC#N)cc3)c3ccccc3-c3cc(-c4ccccc4)cc(-c4ccccc4)c32)cc1	0.674	66.224	4.038
N#COc1ccc(C2(c3ccc(OC#N)cc3)c3ccccc3-c3ccc(Br)cc32)cc1	1.186	62.169	4.003
N#COc1ccc(C2(c3ccc(OC#N)cc3)c3ccccc3-c3cccc(F)c32)cc1	1.418	58.962	4.212
N#COc1ccc(C2(c3ccc(OC#N)cc3)c3ccccc3Cc3ccccc32)cc1	1.281	56.276	4.812
N#COc1ccc(C2(c3ccc(OC#N)cc3)CCCCC2)cc1	1.555	77.721	4.153
N#COc1ccc(C2(c3ccc(OC#N)cc3)NC(=O)c3ccccc32)cc1	2.586	51.773	4.655
N#COc1ccc(C2(c3ccc(OC#N)cc3)NNC(=O)c3ccccc32)cc1	3.111	55.79	5.249
N#COc1ccc(C2(c3ccc(OC#N)cc3)OC(=O)c3c(Br)c(Br)c(Br)c(Br)c32)cc1	0.994	58.513	4.319
N#COc1ccc(C2(c3ccc(OC#N)cc3)OC(=O)c3c(Cl)c(Cl)c(Cl)c(Cl)c32)cc1	1.341	51.324	4.811
N#COc1ccc(C2(c3ccc(OC#N)cc3)OC(=O)c3c(I)c(I)c(I)c(I)c32)cc1	0.695	56.786	3.511
N#COc1ccc(C2(c3ccc(OC#N)cc3)OC(=O)c3cccc4cccc2c34)cc1	1.448	67.686	4.388
N#COc1ccc(C2(c3ccc(OC#N)cc3)OC(=O)c3ccccc32)cc1	1.828	64.298	4.489
N#COc1ccc(C2(c3ccc(OC#N)cc3)Oc3cc(Br)ccc3-c3ccc(Br)cc32)cc1	0.751	60.581	3.846
N#COc1ccc(C2(c3ccc(OC#N)cc3)Oc3ccccc3NC2=O)cc1	2.103	56.153	5.005
N#COc1ccc(C2(c3ccc(OC#N)cc3)ONC(=O)c3ccccc32)cc1	2.49	54.825	5.24
N#COc1ccc(C2(c3ccc(OC#N)cc3)OS(=O)(=O)c3c(Br)c(Br)c(Br)c(Br)c32)cc1	1.272	55.273	4.488
N#COc1ccc(C2(c3ccc(OC#N)cc3)OS(=O)(=O)c3ccccc32)cc1	1.088	55.653	3.627
N#COc1ccc(C2(c3ccc(OC#N)cc3Cl)OS(=O)(=O)c3ccccc32)c(Cl)c1	1.773	50.781	4.628
N#COc1ccc(C2=C3OCOC3=C(c3ccc(OC#N)cc3)C(=O)C2=O)cc1	1.879	61.587	4.686
N#COc1ccc(-c2c(-c3ccc(OC#N)cc3)c3ccccc3oc2=O)cc1	2.216	70.766	3.553
N#COc1ccc(C2C(c3ccc4ccccc4c3)C(=O)N2c2ccc(OC#N)cc2)cc1	1.554	67.199	3.293
N#COc1ccc(-c2c3ccccc3c(-c3ccc(OC#N)c([N+](=O)[O-])c3)c3ccccc23)cc1[N+](=O)[O-]	2.928	58.333	3.94
N#COc1ccc(C2CC(=O)CC(c3ccc(OC#N)cc3)C23C(=O)c2ccccc2C3=O)cc1	1.69	57.739	3.955
N#COc1ccc(-c2cc(-c3ccc(Br)cc3)c(-c3ccc(OC#N)cc3)c(-c3ccc(Br)cc3)c2)cc1	0.455	71.625	3.462
N#COc1ccc(-c2cc(-c3ccc(OC#N)cc3)c3c(c2N)C(=O)NC3=O)cc1	2.748	48.581	5.172
N#COc1ccc(-c2cc(-c3ccccc3)c(-c3ccc(OC#N)cc3)c(=O)o2)cc1	1.567	57.242	3.579
N#COc1ccc(-c2cc(-c3ccccn3)cc(-c3ccc(OC#N)cc3)n2)cc1	1.964	56.551	3.803
N#COc1ccc(C2CC3C4CC(c5ccc(OC#N)cc5)C(C4)C3C2)cc1	0.964	88.154	3.295
N#COc1ccc(-c2ccc(-c3ccc(OC#N)cc3)nc2)cc1	1.852	67.172	3.31
N#COc1ccc(-c2ccc3ccc4ccc(-c5ccc(OC#N)cc5)nc4c3n2)cc1	2.221	56.057	2.987
N#COc1ccc(-c2cccc(-c3ccc(OC#N)cc3)c2)cc1	1.157	70.761	3.414
N#COc1ccc(-c2cocc2-c2ccc(OC#N)cc2Cl)c(Cl)c1	1.687	48.849	3.275
N#COc1ccc(-c2nc3ccccc3nc2-c2ccc(OC#N)c(N)c2)cc1N	3.291	61.529	4.28
N#COc1ccc(-c2nc3nc(N)nc(N)c3nc2-c2ccc(OC#N)cc2)cc1	4.56	50.909	5.271
N#COc1ccc(CC(Cc2ccc(OC#N)cc2)[N+](=O)[O-])cc1	2.023	66.913	3.764
N#COc1ccc(Cc2ccc(OC#N)c(C(=O)Oc3ccccc3)c2)cc1C(=O)Oc1ccccc1	0.822	86.79	4.056
N#COc1ccc(Cc2ccc(OC#N)c(C3CC(c4ccc(Cl)cc4)=NN3)c2)cc1C1CC(c2ccc(Cl)cc2)=NN1	0.413	70.238	3.557
N#COc1ccc(Cc2ccc(OC#N)c(Cl)c2)cc1	2.085	59.045	3.434
N#COc1ccc(Cc2ccc(OC#N)cc2)cc1	1.87	66.609	3.84
N#COc1ccc(CCc2ccc(OC#N)cc2)cc1	1.44	76.439	3.207
N#COc1ccc(CCCCCc2ccc(OC#N)c(N)c2)cc1N	1.865	89.915	4.218
N#COc1ccc(CCCCCCc2ccc(OC#N)c(C=O)c2)cc1C=O	0.861	102.775	4.31
N#COc1ccc(CCCCCCc2ccc(OC#N)cc2)cc1	0.648	99.297	3.176
N#COc1ccc(Cl)c(OC#N)c1	2.918	58.413	3.654
N#COc1ccc(Nc2ccc(OC#N)cc2)cc1	2.919	60.732	4.098
N#COc1ccc(OC#N)c(-c2ccccc2)c1	2.232	63.948	3.682
N#COc1ccc(OC#N)c2c1C(=O)c1ccccc1C2=O	3.84	62.398	3.959
N#COc1ccc(OC#N)cc1	4.844	79.617	3.845
N#COc1ccc(OC2(F)C(F)(F)C(F)(F)C2(F)Oc2ccc(OC#N)cc2)cc1	1.152	86.701	3.331
N#COc1ccc(Oc2ccc(OC#N)cc2)cc1	2.628	83.081	3.631
N#COc1ccc(S(=O)(=O)c2ccc(OC#N)cc2)cc1	4.562	43.78	4.15
N#COc1ccc(Sc2ccc(OC#N)cc2)cc1	1.822	88.52	3.513
N#COc1ccc2c(c1)C(=O)c1ccc(OC#N)cc1C2=O	3.453	36.55	4.021
N#COc1ccc2c(OC#N)cc(OC#N)cc2c1	7.408	31.667	4.197
N#COc1ccc2c(OC#N)cccc2c1	3.058	72.004	3.669
N#COc1ccc2ccc(OC#N)cc2c1	2.984	57.456	3.767
N#COc1cccc(OC#N)c1	4.224	60.272	3.984
N#COc1cccc2c(OC#N)cccc12	3.53	57.387	3.83
N#COc1cccc2c1C(=O)c1cccc(OC#N)c1C2=O	4.759	47.326	3.983
N#COc1ccccc1OC#N	4.11	87.055	3.681
